# Supplementary material for: Respiration aligns perception with neural excitability
Source: eLife journal article supplement (doi:10.7554/elife.70907), 2021-12-14
Supplement: supp [file elife-70907-supp-v1.zip]

Archive with 7 entries (7 files):
- elife_poa_e70907_Figure_1_figure_supplement_1.png
- elife_poa_e70907_Figure_2_figure_supplement_1.png
- elife_poa_e70907_Figure_2_figure_supplement_2.png
- elife_poa_e70907_Figure_3_figure_supplement_1.png
- elife_poa_e70907_Figure_4_figure_supplement_1.png
- elife_poa_e70907_Figure_4_figure_supplement_2.png
- elife_poa_e70907_Transparent_Reporting_File.pdf
